# Supplementary material for: Tannic acid anchored layer-by-layer covalent deposition of parasin I peptide for antifouling and antimicrobial coatings
Source: Royal Society of Chemistry journal article supplement (doi:10.1039/c5ra23374g), 2016-01-01
Supplement: c5ra23374g1.pdf [file c5ra23374g1.pdf]

***Electronic Supplementary Information***

**Tannic Acid Anchored Layer-by-layer Covalent Deposition  
of Parasin I Peptide for Antifouling and Antimicrobial Coatings**

**Gang Xu, Dicky Pranantyo, Bin Zhang, Liqun Xu, Koon-Gee Neoh, En-Tang Kang\***

Department of Chemical & Biomolecular Engineering

National University of Singapore

Kent Ridge, Singapore 119260

\* To whom correspondence should be addressed  
E-mail: [chetket@nus.edu.sg](mailto:chetket@nus.edu.sg) (E.T.K)

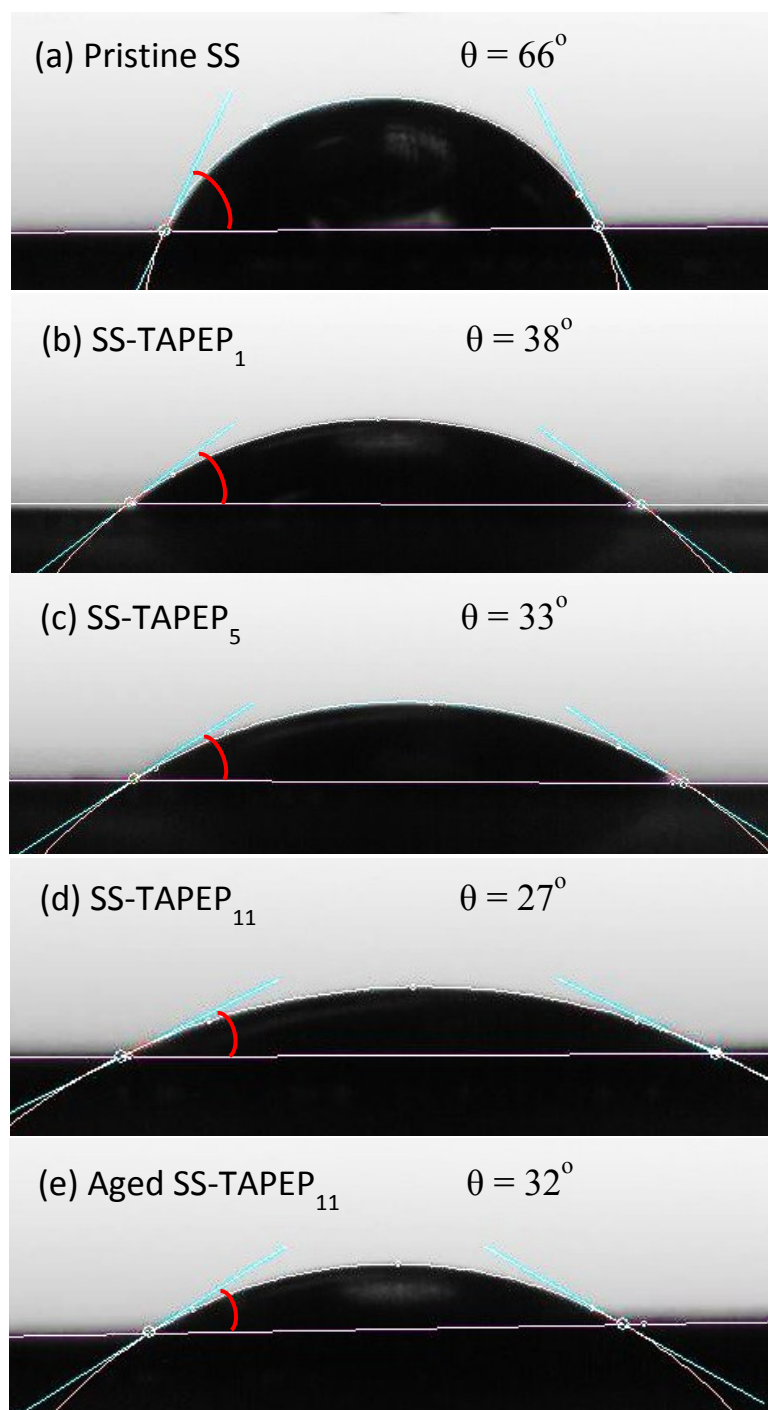

**Figure S1.** Images of water droplets on (a) pristine SS, (b) SS-TAPEP<sub>1</sub>, (c) SS-TAPEP<sub>5</sub>, (d) SS-TAPEP<sub>11</sub> and (e) aged SS-TAPEP<sub>11</sub> surfaces.

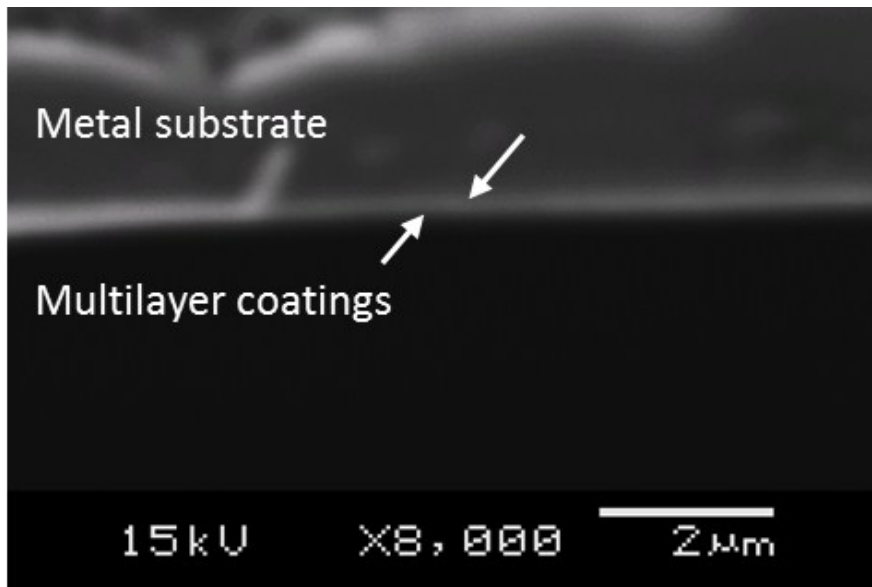

**Figure S2.** Cross-sectional SEM image of SS-TAPEP<sub>11</sub> surface.
